# Supplementary material
Source: PubMed Central journal article supplement (PMC1855042)
Supplement: mbc_E06-09-0872_5.pdf [file mbc_E06-09-0872_5.pdf]

**Supplementary Table 1. PCR primers**

| Gene product  | Primer (forward)          | Primer (reverse)           | Annealing temperature ( °C) | Product size (bp) |
|---------------|---------------------------|----------------------------|-----------------------------|-------------------|
| MyoD          | GCAGGTGTAACCGTAACC        | ACGTACAAATTCCTGTAGC        | 62                          | 170               |
| Myf5          | TGAGAGAGCAGGTGGAGAACTAC   | GCCTTCTCGTCCTGTGTATTAG     | 62                          | 417               |
| Desmin        | CCTACTCTGCCCTCAACTTC      | AGTATCCCAACACCCTGCTC       | 62                          | 565               |
| Myogenin      | GCCACAGATGCCACTACTTC      | CAACTTCAGCACAGGAGACC       | 62                          | 519               |
| MyHC-IIx/d    | CAGTAGCCCCATCACATTTG      | ATAACGCAATGGACAAGTGG       | 65                          | 566               |
| Dystropin     | CAGTAGCCCCATCACATTTG      | ATAACGCAATGGACAAGTGG       | 62                          | 566               |
| 18S           | GTGGAGCGATTTGTCTGGTT      | CGCTGAGCCAGTCAGTGTAG       | 62                          | 200               |
| Scid          | GGAAAAGAATTGGTATCCAC      | AGTTATAACAGCTGGGTGGC       | 57                          | 64                |
| Mdx           | AACTCATCAAATATGCGTGTTAGTG | GTCCTCAGATAGTTGAAGCCATTTAA | 57                          | 105               |
| Wild-type mdx | AACTCATCAAATATGCGTGTTAGTG | GTCCTCAGATAGTTGAAGCCATTTAG | 57                          | 105               |

**Supplementary Table 1**
