# Supplementary material
Source: PubMed Central journal article supplement (PMC1855042)

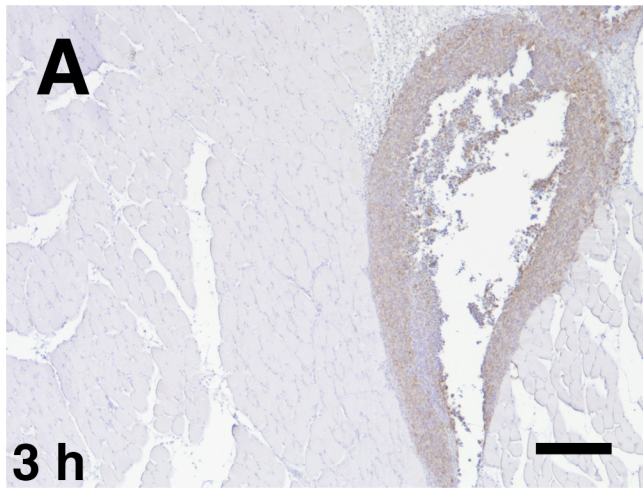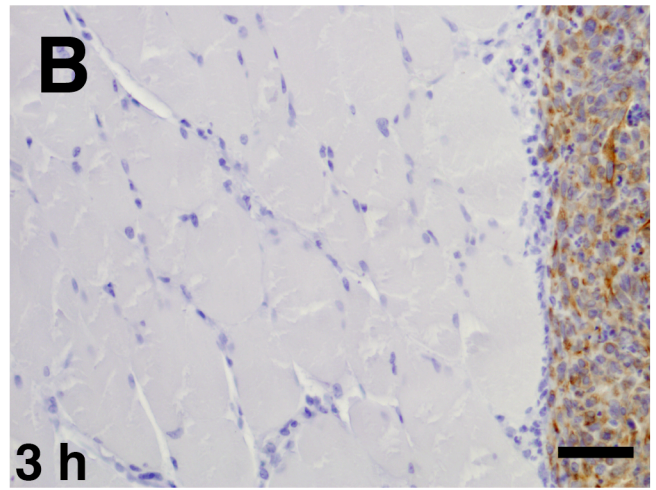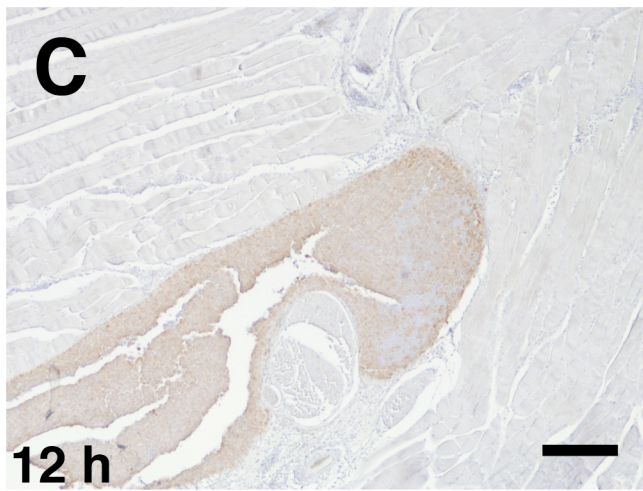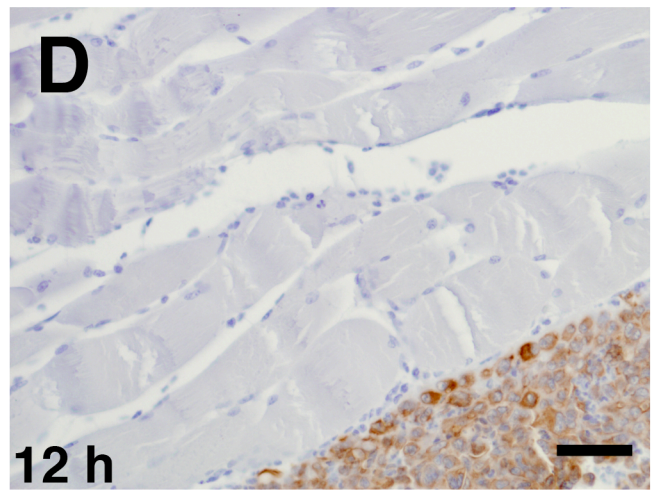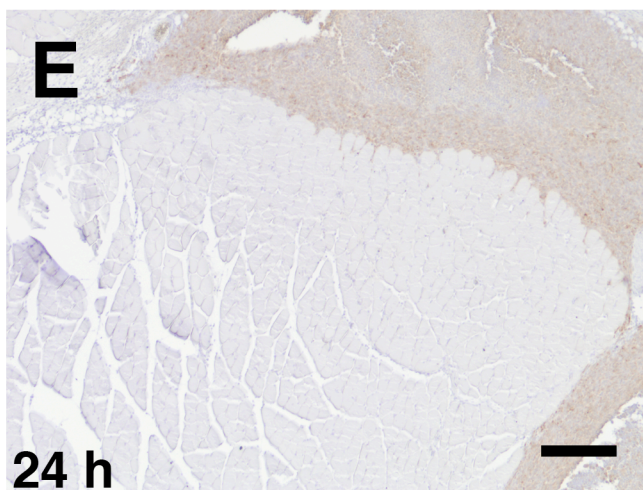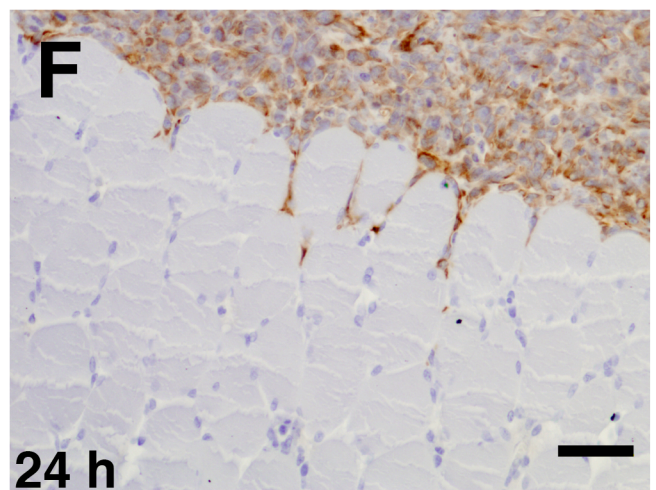

Supplementary Figure 1 A-F

Supplement: mbc_E06-09-0872_1.pdf [file mbc_E06-09-0872_1.pdf]

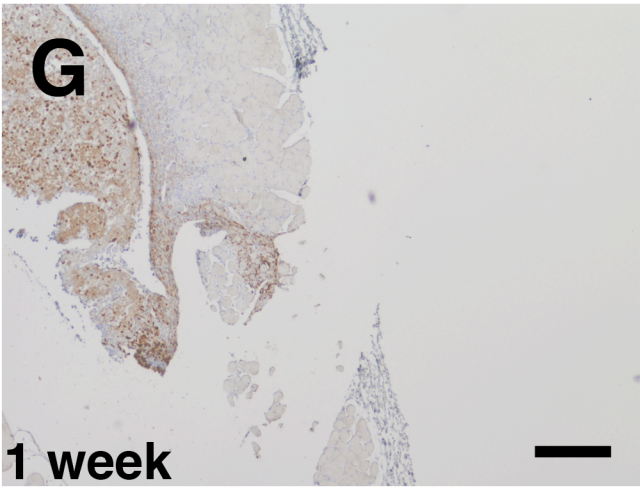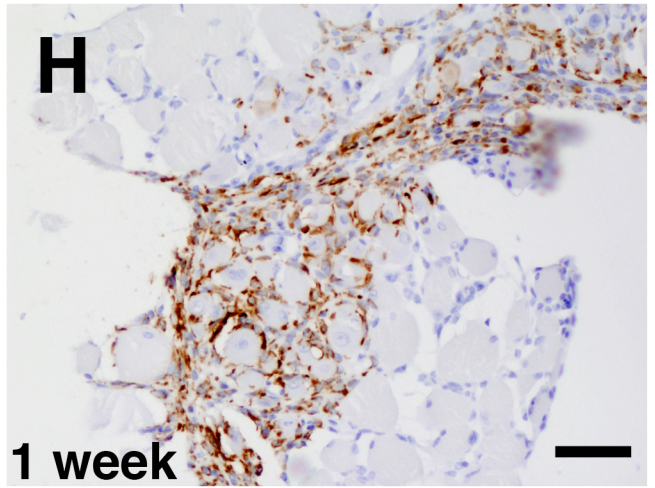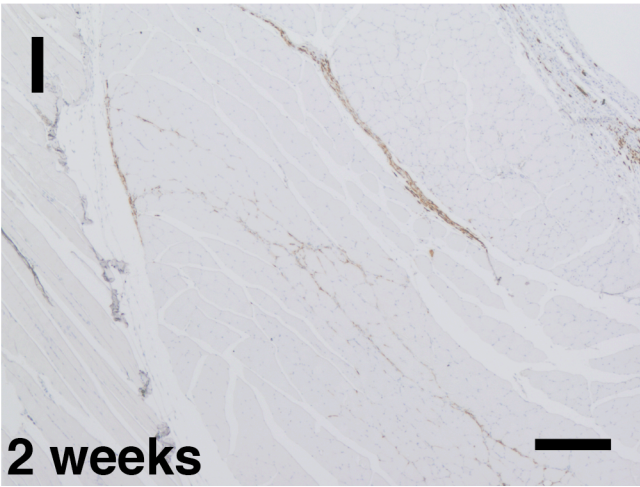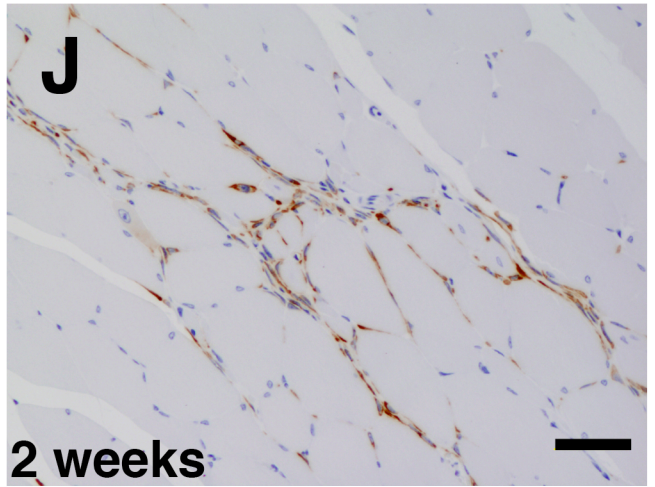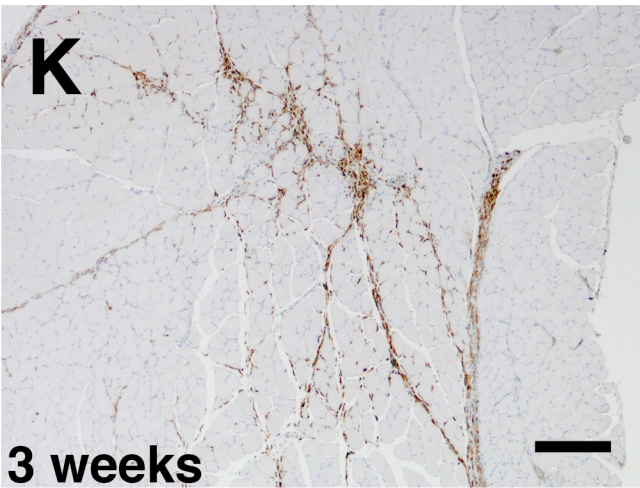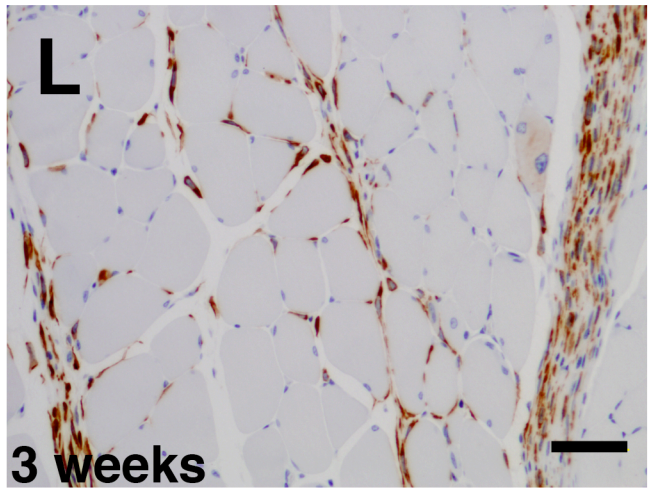

Supplementary Figure 1 G-L

Supplement: mbc_E06-09-0872_2.pdf [file mbc_E06-09-0872_2.pdf]

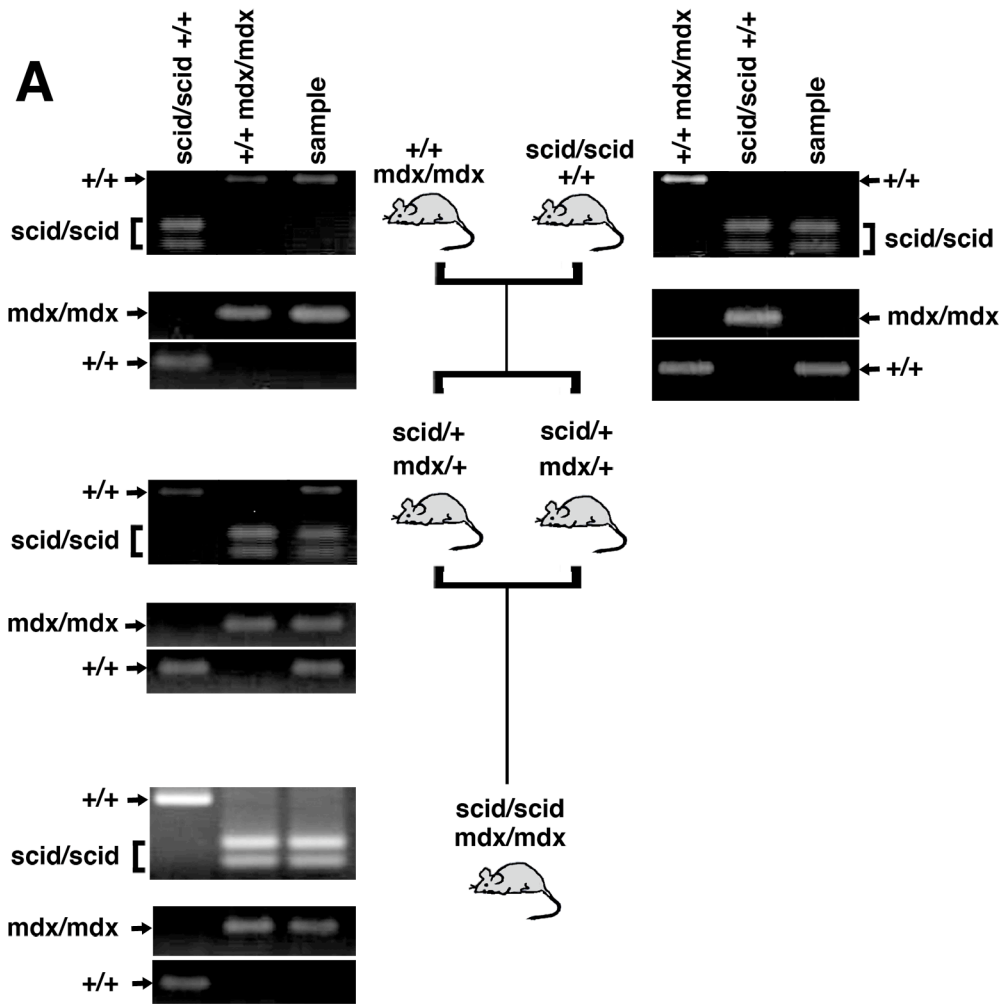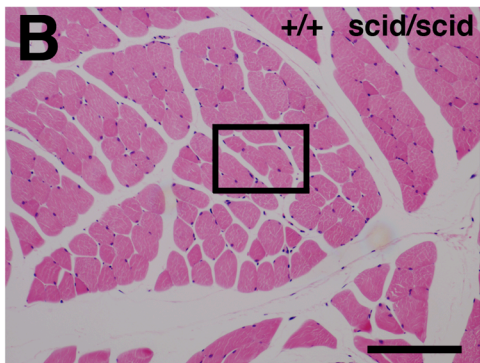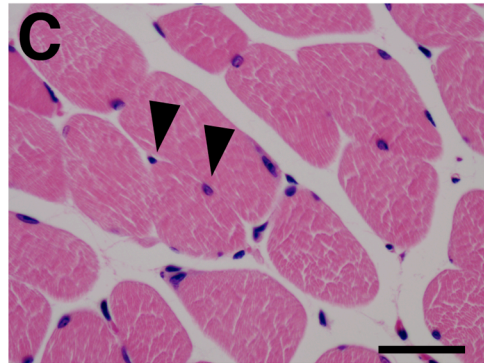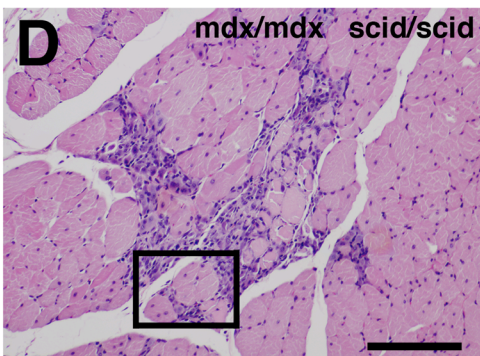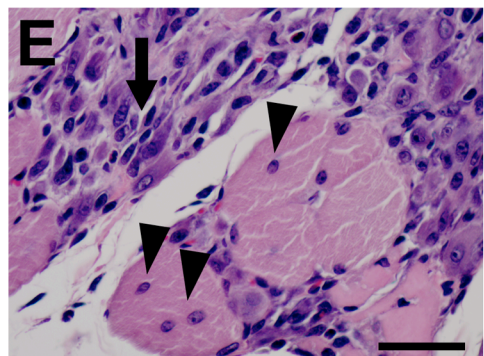

Supplementary Figure 2

Supplement: mbc_E06-09-0872_3.pdf [file mbc_E06-09-0872_3.pdf]

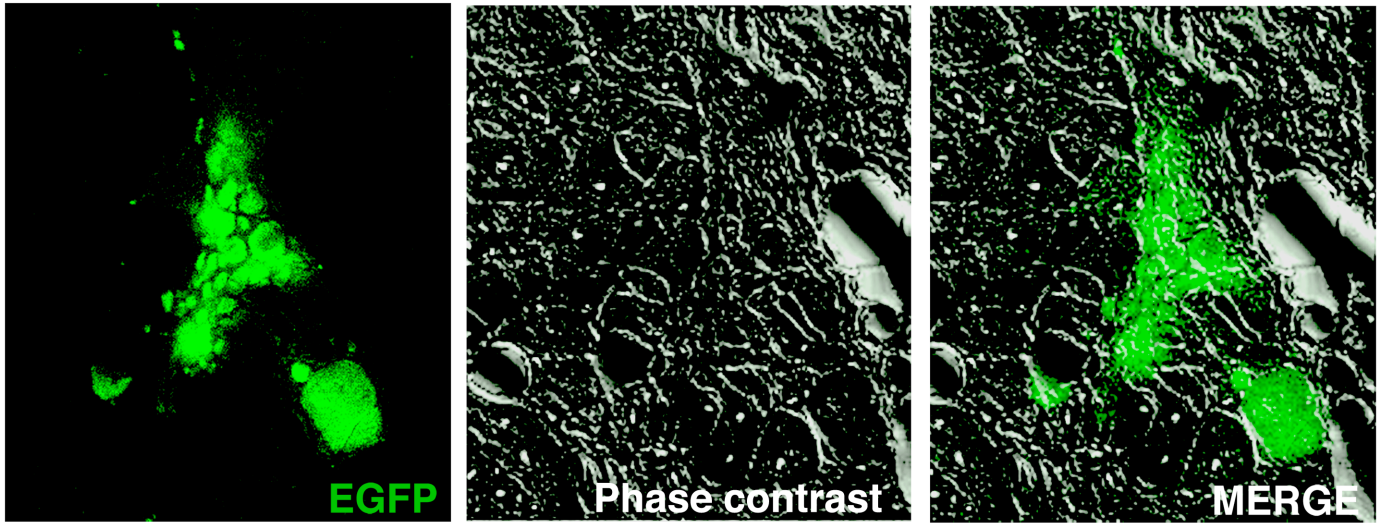

Supplementary Figure 3

Supplement: mbc_E06-09-0872_4.pdf [file mbc_E06-09-0872_4.pdf]
